# Supplementary material
Source: PubMed Central journal article supplement (PMC5098626)
Supplement: pnas.1607398113.sapp.pdf [file pnas.1607398113.sapp.pdf]

**This is a survey on attitudes toward political issues and groups of people. This same survey is being conducted in several countries around the world.**

**We do not collect any names in this survey, and no one will know that you answered the questions in the way that you answered them. Please be as honest as possible when answering the questions. If you feel uncomfortable answering a question, please simply skip that question.**

First, we would like to ask you about your opinions on several issues that people often hear about in the news. Please circle "yes" or "no" for each question:

- |                                                                                    |        |         |
|------------------------------------------------------------------------------------|--------|---------|
| 1. Is climate change is a very serious problem?                                    | 1 – no | 2 – yes |
| 2. Are genetically modified (GMO) foods safe to eat?                               | 1 – no | 2 – yes |
| 3. Should society <i>accept</i> homosexuality?                                     | 1 – no | 2 – yes |
| 4. Is it <i>morally acceptable</i> for adults to use drugs recreationally?         | 1 – no | 2 – yes |
| 5. Should your country be <i>more open</i> to immigrants?                          | 1 – no | 2 – yes |
| 6. Should society increase its use of <i>nuclear power</i> ?                       | 1 – no | 2 – yes |
| 7. Should homosexuals have the <i>exact same marriage rights</i> as heterosexuals? | 1 – no | 2 – yes |
| 8. Are you in favor of your organs being donated to others after you die?          | 1 – no | 2 – yes |

.....

We would like to get your feelings towards some different groups in society, using something called a *feeling thermometer*. Ratings between 50 degrees and 100 degrees mean that you feel *warm and favorable* toward that group. Ratings between 0 degrees and 50 degrees mean that you *don't feel favorable* toward that group and *don't care much for the group*. You would rate a group at 50 if you didn't feel particularly warm or cold towards that group – you feel neutral.

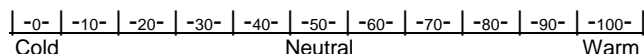

For each group, please place a *check mark* or a *line* in box that contains the *temperature* that best represents **your feeling** toward each group of people below. So, how do **you** feel about each group?

- |                                       |                                                                            |
|---------------------------------------|----------------------------------------------------------------------------|
| 1. <i>Gay Men</i>                     | -0-   -10-   -20-   -30-   -40-   -50-   -60-   -70-   -80-   -90-   -100- |
| 2. <i>Farmers</i>                     | -0-   -10-   -20-   -30-   -40-   -50-   -60-   -70-   -80-   -90-   -100- |
| 3. <i>Prostitutes</i>                 | -0-   -10-   -20-   -30-   -40-   -50-   -60-   -70-   -80-   -90-   -100- |
| 4. <i>Atheists</i>                    | -0-   -10-   -20-   -30-   -40-   -50-   -60-   -70-   -80-   -90-   -100- |
| 5. <i>Lawyers</i>                     | -0-   -10-   -20-   -30-   -40-   -50-   -60-   -70-   -80-   -90-   -100- |
| 6. <i>Lesbian women</i>               | -0-   -10-   -20-   -30-   -40-   -50-   -60-   -70-   -80-   -90-   -100- |
| 7. <i>Politicians</i>                 | -0-   -10-   -20-   -30-   -40-   -50-   -60-   -70-   -80-   -90-   -100- |
| 8. <i>Sexually promiscuous people</i> | -0-   -10-   -20-   -30-   -40-   -50-   -60-   -70-   -80-   -90-   -100- |

There are many types of groups in the world: men and women, ethnic and religious groups, nationalities, political factions, etc. Please circle a number to rate the degree to which you *oppose* or *favor* each statement about groups, where higher numbers mean you favor the statement more, and lower numbers mean you oppose the statement more:

|                                                       | Extremely Oppose |   |   |   |   | Extremely Favor |   |
|-------------------------------------------------------|------------------|---|---|---|---|-----------------|---|
| 1. In setting priorities, we must consider all groups | 0                | 1 | 2 | 3 | 4 | 5               | 6 |
| 2. We should <i>not</i> push for group equality       | 0                | 1 | 2 | 3 | 4 | 5               | 6 |
| 3. Group equality should be our ideal                 | 0                | 1 | 2 | 3 | 4 | 5               | 6 |
| 4. Superior groups should dominate inferior groups    | 0                | 1 | 2 | 3 | 4 | 5               | 6 |

.....

The following questions concern values that people may or may not hold. Please circle a number to indicate the degree to which you *disagree* or *agree* with each statement, where higher numbers mean you agree with the statement more and lower numbers mean you disagree with the statement more.

|                                                                                                                                          | Strongly Disagree |   |   |   |   | Strongly Agree |   |
|------------------------------------------------------------------------------------------------------------------------------------------|-------------------|---|---|---|---|----------------|---|
| 1. The "old fashioned ways" and "old fashioned values" still show the best way to live.                                                  | 0                 | 1 | 2 | 3 | 4 | 5              | 6 |
| 2. God's laws about abortion, pornography, and marriage must be strictly followed before it is too late                                  | 0                 | 1 | 2 | 3 | 4 | 5              | 6 |
| 3. There is absolutely nothing wrong with nudist camps                                                                                   | 0                 | 1 | 2 | 3 | 4 | 5              | 6 |
| 4. This country will flourish if young people stop experimenting with drugs, alcohol, and sex, and pay more attention to family values.  | 0                 | 1 | 2 | 3 | 4 | 5              | 6 |
| 5. There is nothing wrong with premarital sexual intercourse.                                                                            | 0                 | 1 | 2 | 3 | 4 | 5              | 6 |
| 6. Nobody should stick to the "straight and narrow." Instead, people should break loose and try lots of different ideas and experiences. | 0                 | 1 | 2 | 3 | 4 | 5              | 6 |

.....

Please answer the following questions by circling "No" (this statement does not describe me) or "Yes" (this statement describes me):

- |                                                     |        |         |
|-----------------------------------------------------|--------|---------|
| 1. I believe faith in God is important for morality | 1 – No | 2 – Yes |
| 2. Religion is very important to my life            | 1 – No | 2 – Yes |
| 3. I pray at least once per day                     | 1 – No | 2 – Yes |

Psychologists are often interested in emotions, and how emotions relate to attitudes. This scale asks about the emotion *disgust*. Each item describes something that some people find very disgusting, and other people find less disgusting. Please rate how *disgusting* you find the concepts described in the items by circling a number, where *lower* values mean that you find the concept *less disgusting*, and *higher* values mean that you find the concept *more disgusting*.

|                                                           | not at all<br>disgusting |   |   |   | extremely<br>disgusting |   |   |  |
|-----------------------------------------------------------|--------------------------|---|---|---|-------------------------|---|---|--|
| 1. Stepping on dog poop                                   | 0                        | 1 | 2 | 3 | 4                       | 5 | 6 |  |
| 2. Sitting next to someone who has red sores on their arm | 0                        | 1 | 2 | 3 | 4                       | 5 | 6 |  |
| 3. Shaking hands with a stranger who has sweaty palms     | 0                        | 1 | 2 | 3 | 4                       | 5 | 6 |  |
| 4. Seeing some mold on old leftovers in your refrigerator | 0                        | 1 | 2 | 3 | 4                       | 5 | 6 |  |
| 5. Standing close to a person who has body odor           | 0                        | 1 | 2 | 3 | 4                       | 5 | 6 |  |
| 6. Seeing a cockroach run across the floor                | 0                        | 1 | 2 | 3 | 4                       | 5 | 6 |  |
| 7. Accidentally touching a person's bloody cut            | 0                        | 1 | 2 | 3 | 4                       | 5 | 6 |  |

.....

The following questions ask about your age, gender, and religion. We are *not* comparing different religious groups in this survey. We are asking these questions to better understand who is taking the survey.

Please indicate whether you are a man or a woman (circle one)          1 – Man          2 – Woman

Please write your age, in years          \_\_\_\_\_ years old

Of the following, what **best** describes your religion? Please circle only one:

1 – Buddhist    2 – Christian    3 – Hindu    4 – Jewish    5 – Muslim    6 – Non-religious    7 – Other

Who are you more *physically* and *romantically* attracted to: men or to women?

1 – I am more attracted to Men          2 – I am more attracted to Women
